# Supplementary material
Source: PubMed Central journal article supplement (PMC5729633)

# Supplementary Figure 1

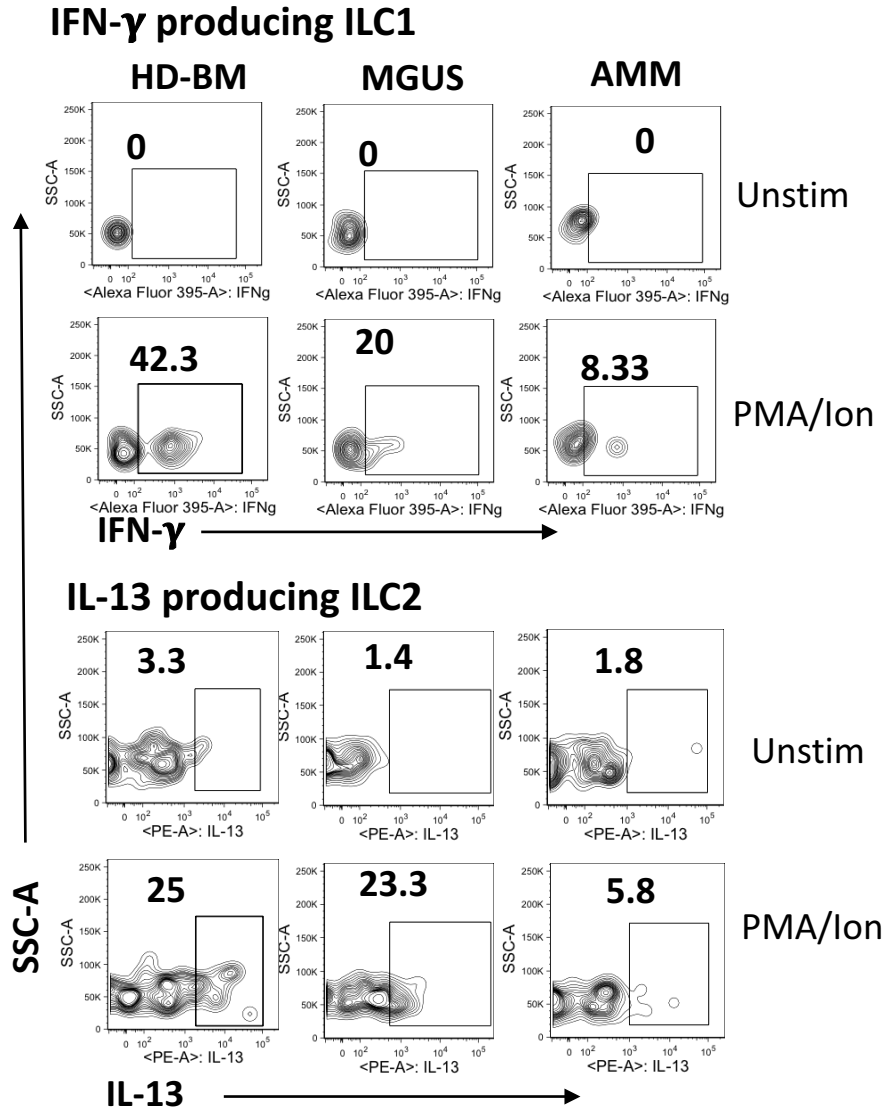

# Supplementary Figure 2

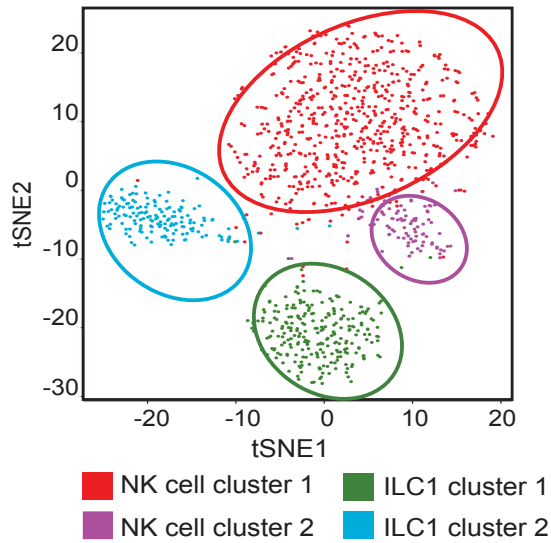

## ILC1 Cluster 1

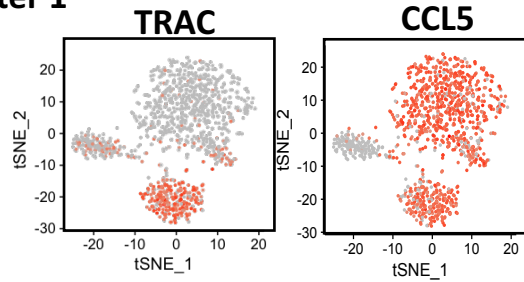

## ILC1 Cluster 2

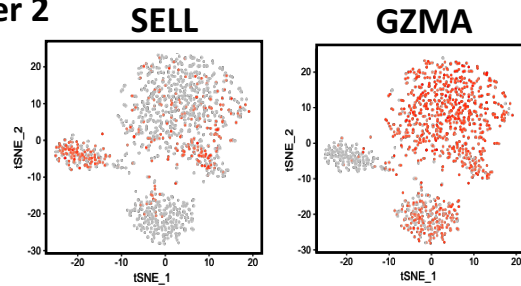

## NK cell Cluster 1

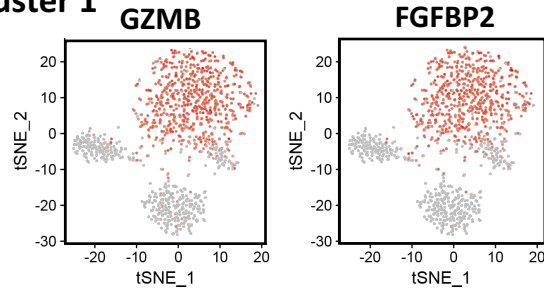

## NK cell Cluster 2

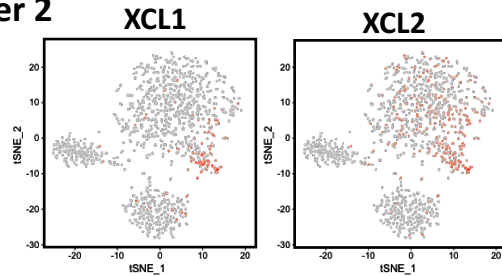

Supplement: ba012732-suppl1.pdf [file ba012732-suppl1.pdf]
